# Supplementary material for: Atractylenolide III ameliorates spinal cord injury in rats by modulating microglial/macrophage polarization
Source: PubMed Central journal article supplement (PMC9160450; doi:10.1111/cns.13839), 2022-04-10

# Full unedited blot for Figure 5A

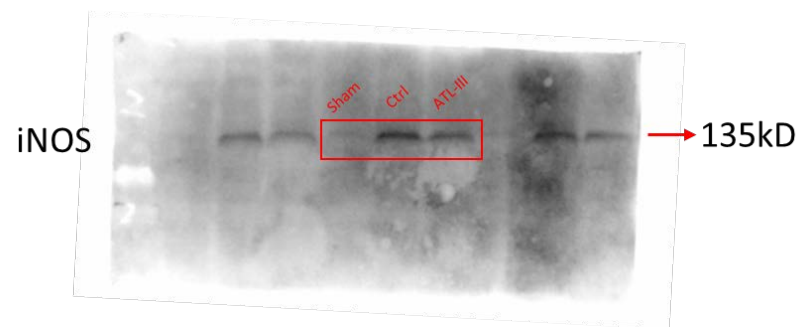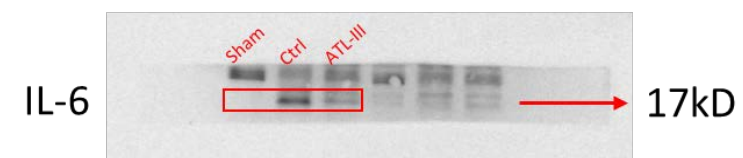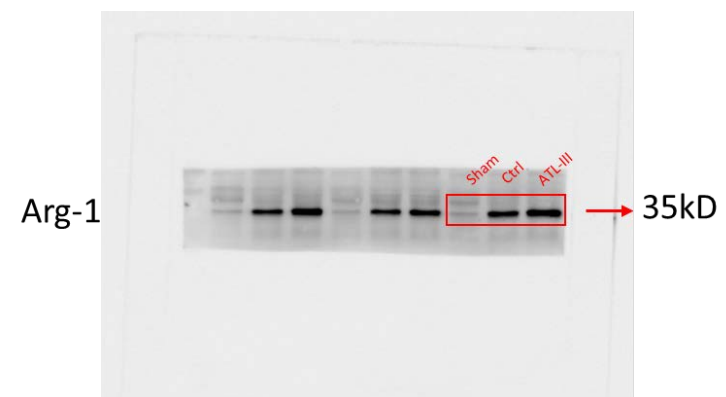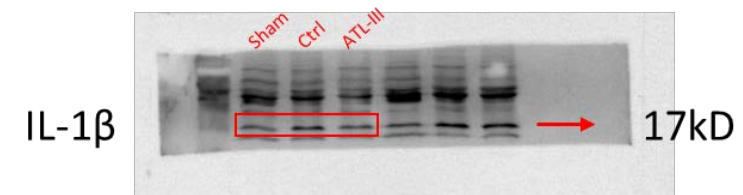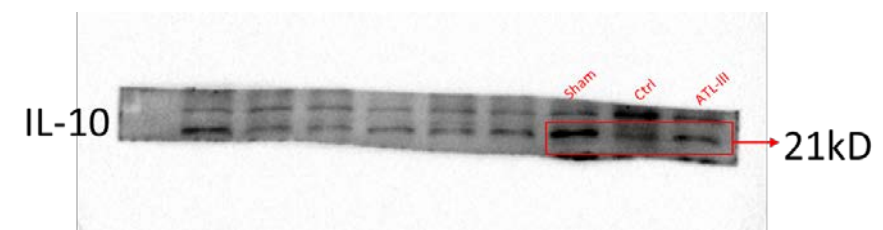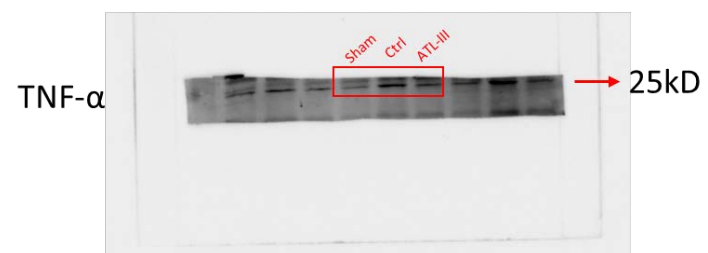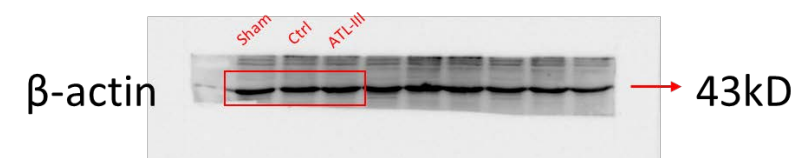

# Full unedited blot for Figure 6B

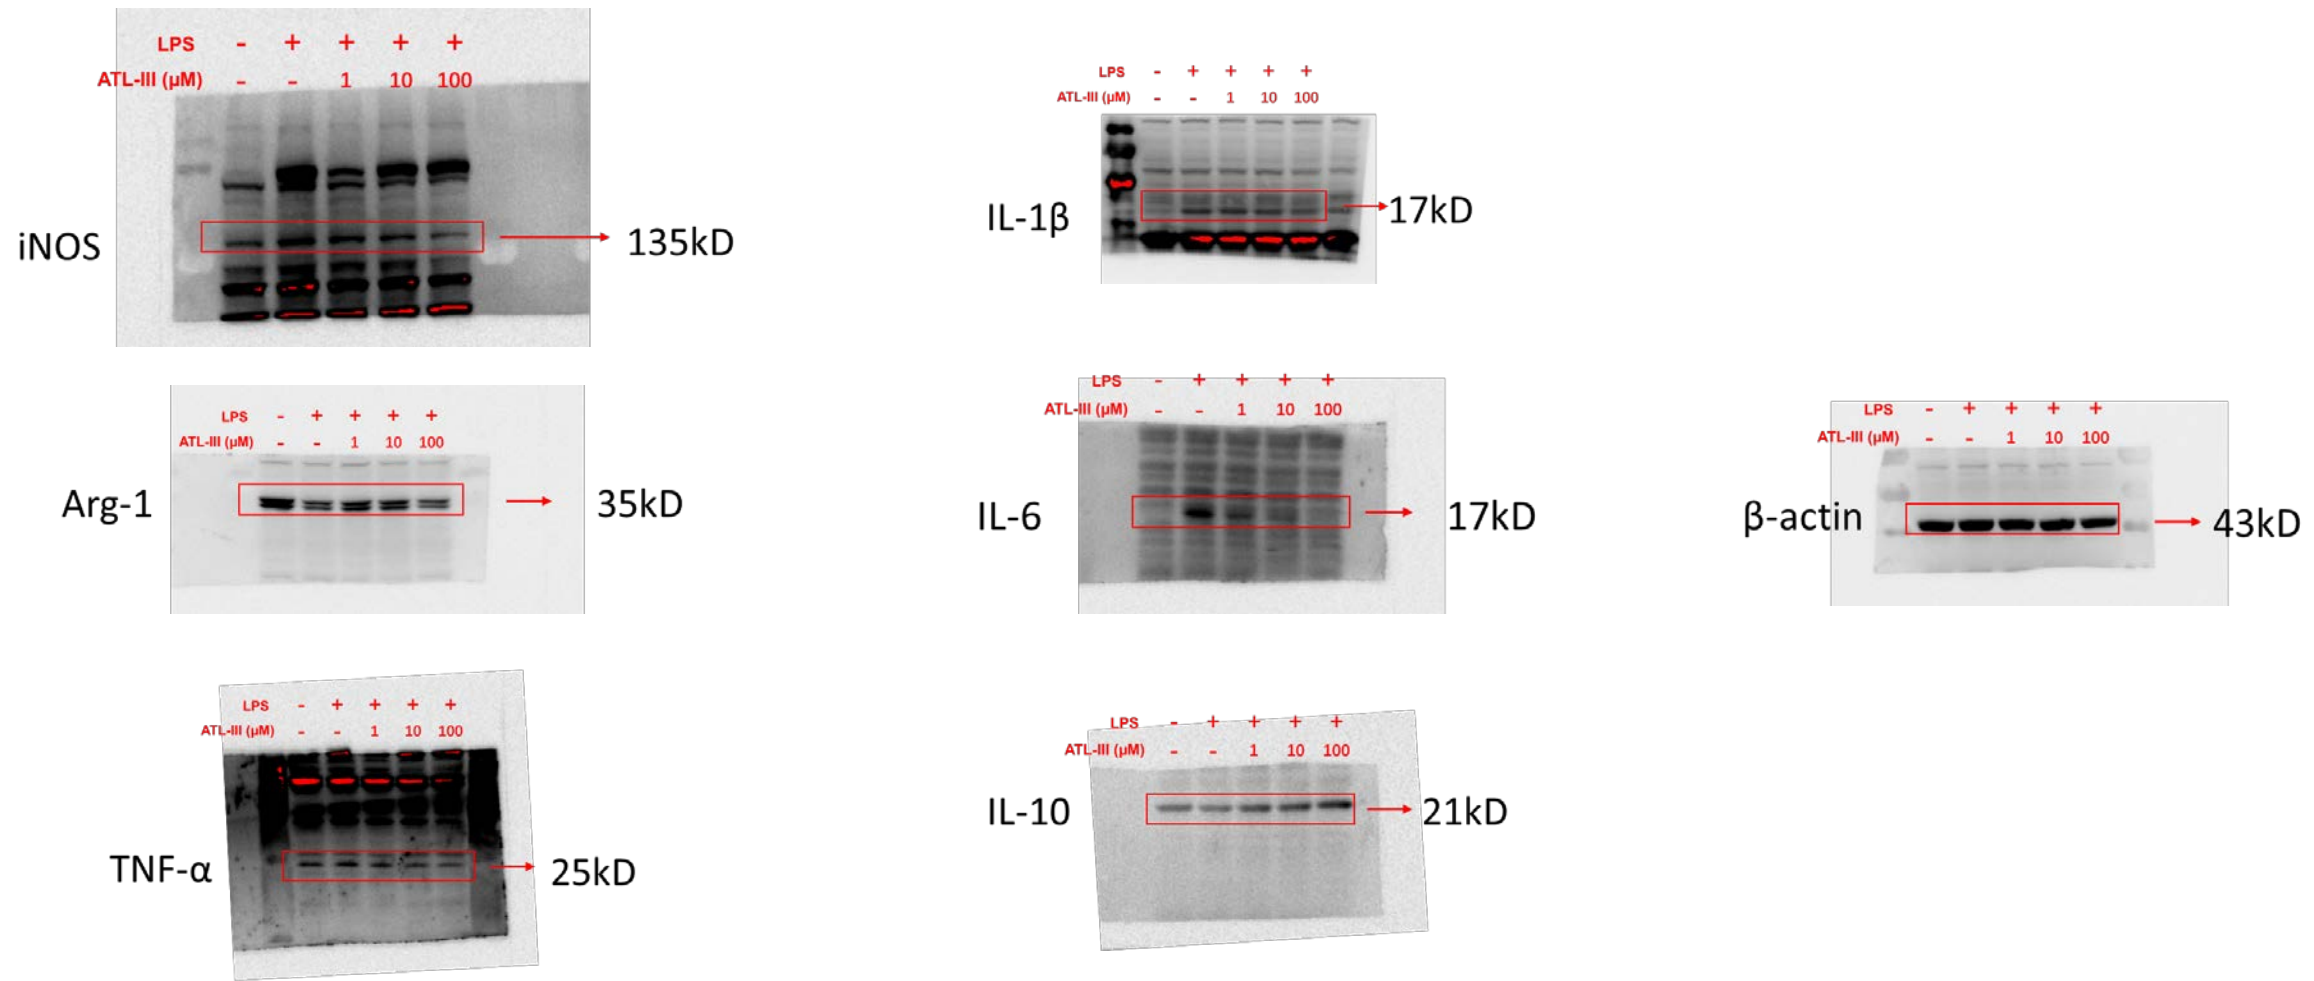

Full unedited blot for Figure 7A

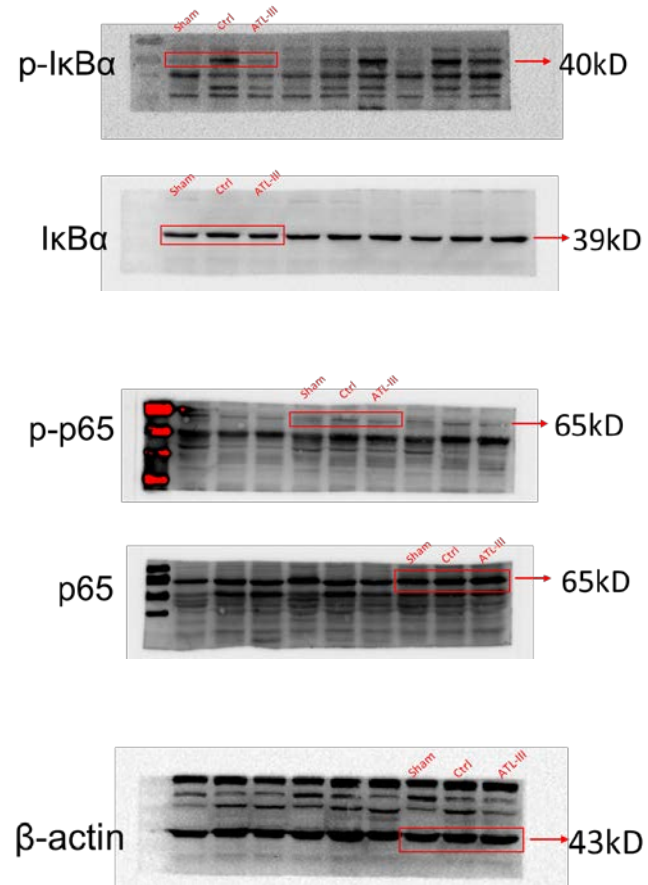

Full unedited blot for Figure 7B

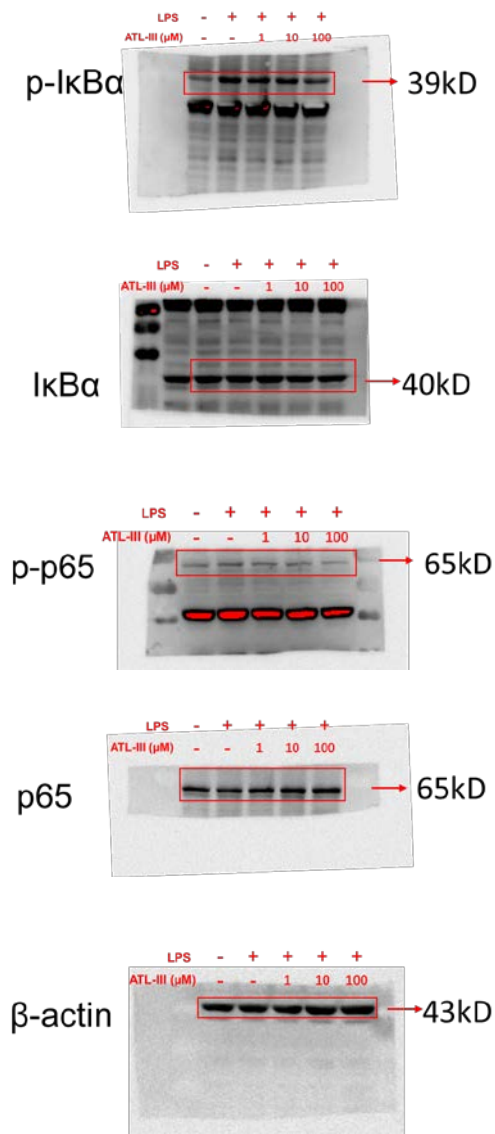

Full unedited blot for Figure 7C

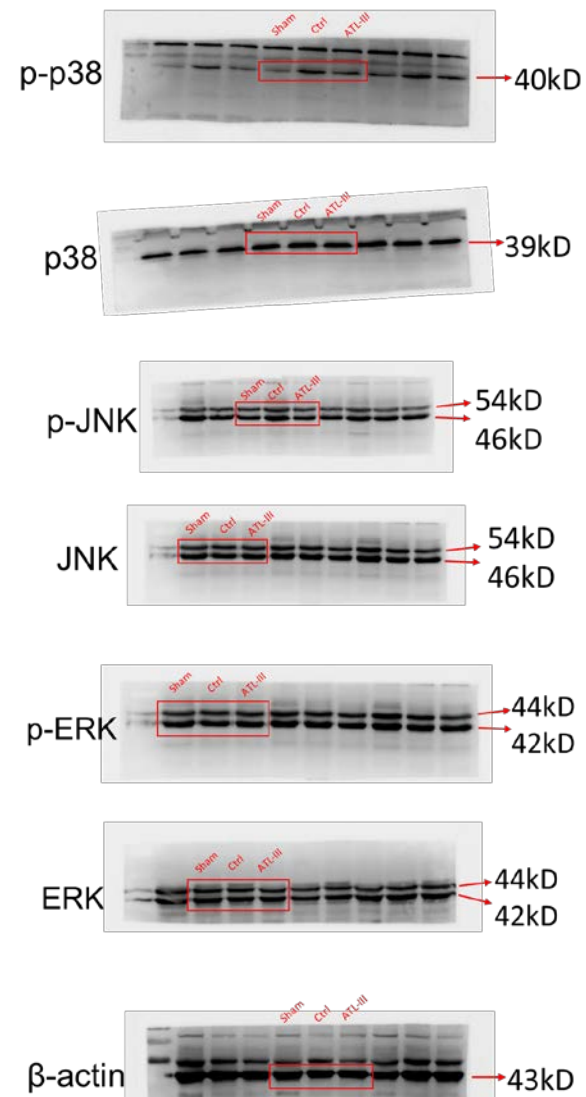

Full unedited blot for Figure 7D

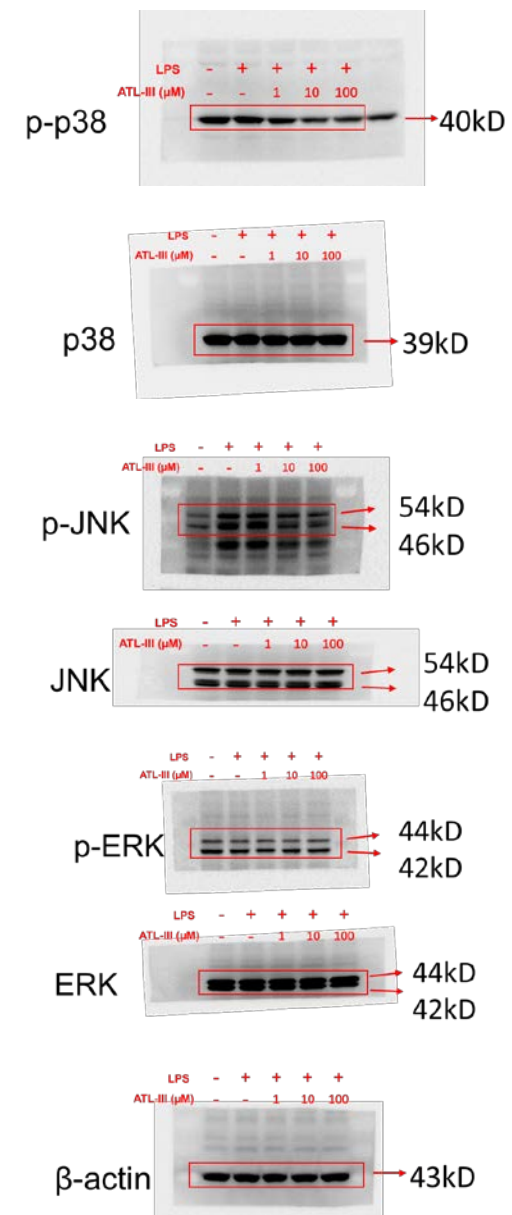

Full unedited blot for Figure 7E

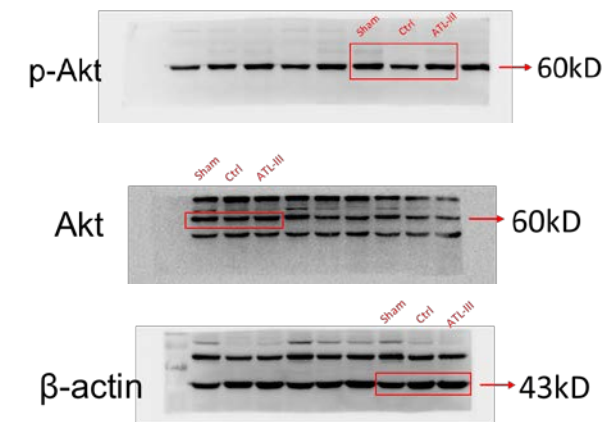

Full unedited blot for Figure 7F

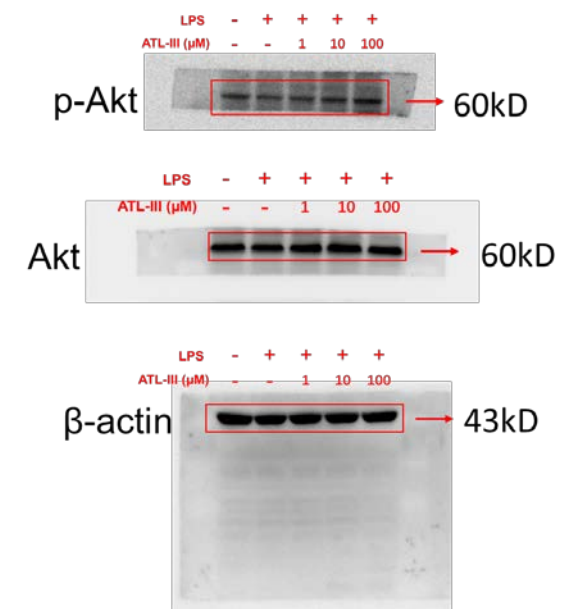

# Supplemental Figure. S1

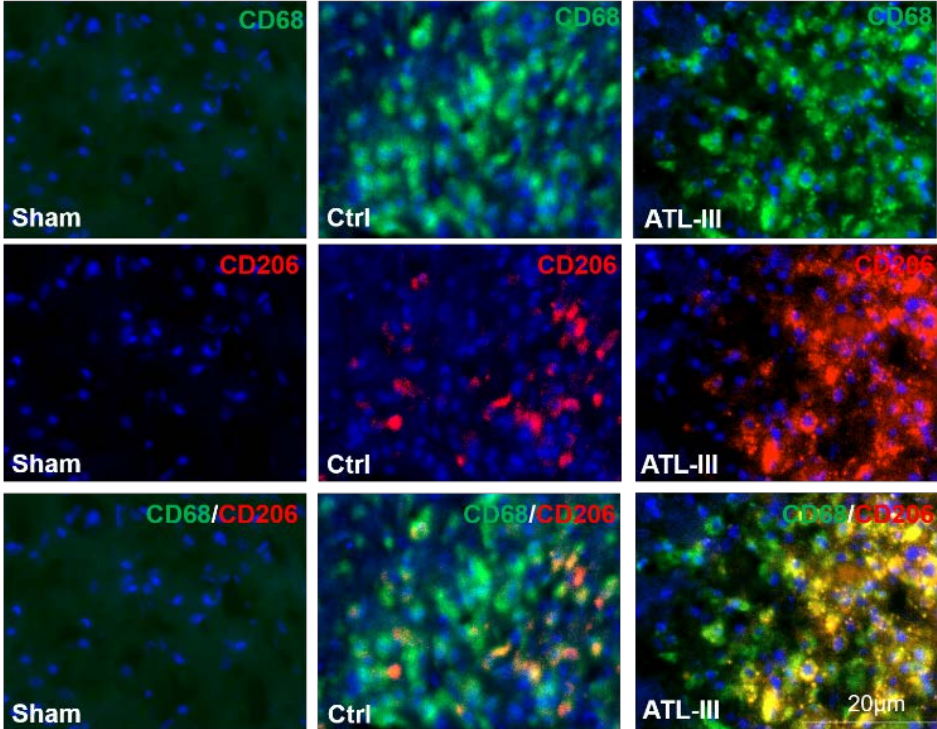

# Supplemental Figure. S2

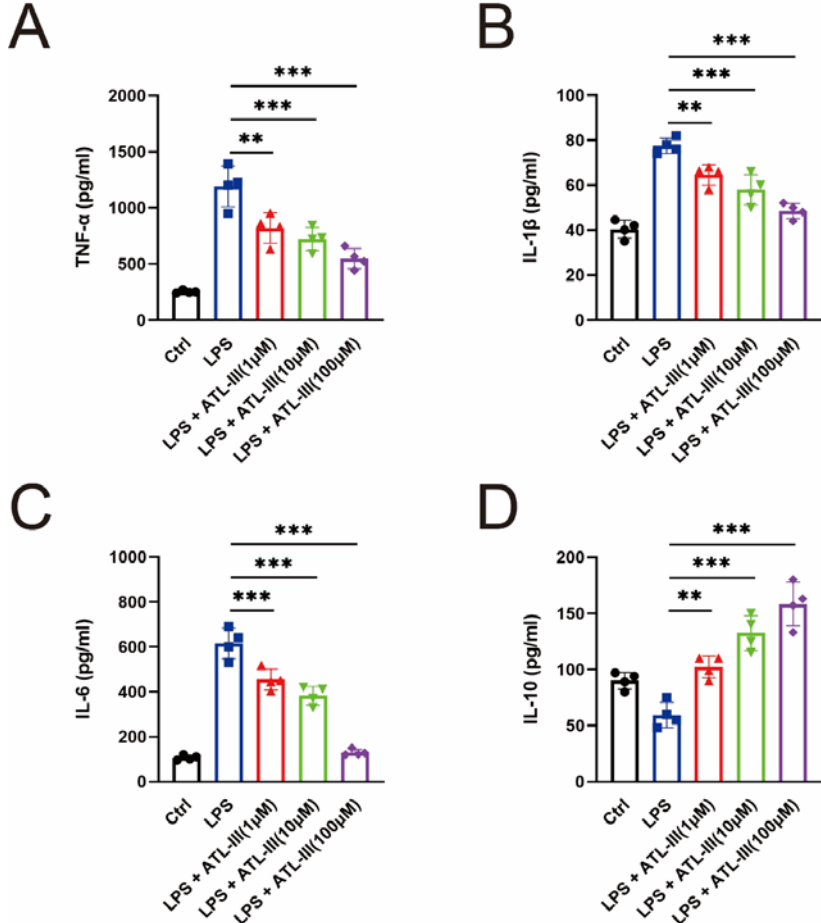

Supplement: CNS-28-1059-s001.pdf [file CNS-28-1059-s001.pdf]
